# Supplementary material for: Decreased Tiam1‐mediated Rac1 activation is responsible for impaired directional persistence of chondrocyte migration in microtia
Source: PubMed Central journal article supplement (PMC11149491; doi:10.1111/jcmm.18443), 2024-06-04
Supplement: JCMM-28-e18443-s006.pdf [file JCMM-28-e18443-s006.pdf]

|   | 1     | 2      | 3     | 4     | 5     | 6     | 7     | 8       | 9       | 10       | 11    | 12    |
|---|-------|--------|-------|-------|-------|-------|-------|---------|---------|----------|-------|-------|
| A | ACTN1 | ACTN3  | ACTN4 | ACTR2 | ACTR3 | AKT1  | ARF6  | ARHGDIA | ARHGEF7 | BAIAP2   | BCAR1 | CAPN1 |
| B | CAPN2 | CAV1   | CDC42 | CFL1  | CRK   | CSF1  | CTTN  | DIAPH1  | DPP4    | EGF      | EGFR  | ENAH  |
| C | EZR   | FAP    | FGF2  | HGF   | IGF1  | IGF1R | ILK   | ITGA4   | ITGB1   | ITGB2    | ITGB3 | LIMK1 |
| D | MAPK1 | MET    | MMP14 | MMP2  | MMP9  | MSN   | MYH10 | MYH9    | MYL9    | MYLK     | PAK1  | PAK4  |
| E | PFN1  | PIK3CA | PLAUR | PLCG1 | PLD1  | PRKCA | PTEN  | PTK2    | PTK2B   | PTPN1    | PXN   | RAC1  |
| F | RAC2  | RASA1  | RDX   | RHO   | RHOA  | RHOB  | RHOC  | RND3    | ROCK1   | SH3PXD2A | SRC   | STAT3 |
| G | SVIL  | TGFB1  | TIMP2 | TLN1  | VASP  | VCL   | VEGFA | VIM     | WASF1   | WASF2    | WASL  | WIPF1 |
| H | ACTB  | B2M    | GAPDH | HPRT1 | RPLP0 | HGDC  | NTC   | NTC     | NTC     | PPC      | PPC   | PPC   |

| Position | Unigene   | Refseq       | Symbol  | Description                                                                                  | Gname                                                                      |
|----------|-----------|--------------|---------|----------------------------------------------------------------------------------------------|----------------------------------------------------------------------------|
| A01      | Hs.235750 | NM_001102    | ACTN1   | Actinin, alpha 1                                                                             | BDPLT15                                                                    |
| A02      | Hs.737862 | NM_001104    | ACTN3   | Actinin, alpha 3                                                                             | -                                                                          |
| A03      | Hs.270291 | NM_004924    | ACTN4   | Actinin, alpha 4                                                                             | ACTININ-4/FSGS/FSGS1                                                       |
| A04      | Hs.643727 | NM_005722    | ACTR2   | ARP2 actin-related protein 2 homolog (yeast)                                                 | ARP2                                                                       |
| A05      | Hs.433512 | NM_005721    | ACTR3   | ARP3 actin-related protein 3 homolog (yeast)                                                 | ARP3                                                                       |
| A06      | Hs.525622 | NM_005163    | AKT1    | V-akt murine thymoma viral oncogene homolog 1                                                | AKT/CWS6/PKB/PKB-ALPHA/PRKBA/RAC/RAC-ALPHA                                 |
| A07      | Hs.525330 | NM_001663    | ARF6    | ADP-ribosylation factor 6                                                                    | -                                                                          |
| A08      | Hs.599508 | NM_004309    | ARHGDI1 | Rho GDP dissociation inhibitor (GDI) alpha                                                   | GDIA1/HEL-S-47e/NPHS8/RHOGLI/RHOGLI-1                                      |
| A09      | Hs.508738 | NM_003899    | ARHGEF7 | Rho guanine nucleotide exchange factor (GEF) 7                                               | BETA-PIX/COOL-1/COOL1/Nbla10314/P50/P50BP/P85/P85COOL1/P85SPR/PAK3/PIXB    |
| A10      | Hs.128316 | NM_006340    | BAIAP2  | BAI1-associated protein 2                                                                    | BAP2/FLAF3/IRSP53                                                          |
| A11      | Hs.479747 | NM_014567    | BCAR1   | Breast cancer anti-estrogen resistance 1                                                     | CAS/CAS1/CASS1/CRKAS/P130Cas                                               |
| A12      | Hs.502842 | NM_005186    | CAPN1   | Calpain 1, (mu/I) large subunit                                                              | CANP/CANP1/CANPL1/muCANP/muCL                                              |
| B01      | Hs.350899 | NM_001748    | CAPN2   | Calpain 2, (m/II) large subunit                                                              | CANP2/CANPL2/CANPml/mCANP                                                  |
| B02      | Hs.74034  | NM_001753    | CAV1    | Caveolin 1, caveolae protein, 22kDa                                                          | BSCL3/CGL3/LCCNS/MSTP085/PPH3/VIP21                                        |
| B03      | Hs.467637 | NM_001791    | CDC42   | Cell division cycle 42 (GTP binding protein, 25kDa)                                          | CDC42Hs/G25K                                                               |
| B04      | Hs.170622 | NM_005507    | CFL1    | Cofilin 1 (non-muscle)                                                                       | CFL/HEL-S-15/cofilin                                                       |
| B05      | Hs.461896 | NM_016823    | CRK     | V-crk sarcoma virus CT10 oncogene homolog (avian)                                            | CRKII/p38                                                                  |
| B06      | Hs.173894 | NM_000757    | CSF1    | Colony stimulating factor 1 (macrophage)                                                     | CSF-1/MCSF                                                                 |
| B07      | Hs.596164 | NM_005231    | CTTN    | Cortactin                                                                                    | EMS1                                                                       |
| B08      | Hs.529451 | NM_005219    | DIAPH1  | Diaphanous homolog 1 (Drosophila)                                                            | DFNA1/DIA1/DRF1/LFHL1/hDIA1                                                |
| B09      | Hs.368912 | NM_001935    | DPP4    | Dipeptidyl-peptidase 4                                                                       | ADABP/ADCP2/CD26/DPPIV/TP103                                               |
| B10      | Hs.419815 | NM_001963    | EGF     | Epidermal growth factor                                                                      | HOMG4/URG                                                                  |
| B11      | Hs.488293 | NM_005228    | EGFR    | Epidermal growth factor receptor                                                             | ERBB/ERBB1/HER1/NISBD2/PIG61/mENA                                          |
| B12      | Hs.497893 | NM_001008493 | ENAH    | Enabled homolog (Drosophila)                                                                 | ENA/MENA/NDPP1                                                             |
| C01      | Hs.487027 | NM_003379    | EZR     | Ezrin                                                                                        | CVIL/CVL/HEL-S-105/VIL2                                                    |
| C02      | Hs.654370 | NM_004460    | FAP     | Fibroblast activation protein, alpha                                                         | DPPIV/FAPA/SIMP                                                            |
| C03      | Hs.284244 | NM_002006    | FGF2    | Fibroblast growth factor 2 (basic)                                                           | BFGF/FGF-2/FGFB/HBGF-2                                                     |
| C04      | Hs.396530 | NM_000601    | HGF     | Hepatocyte growth factor (hepapoietin A; scatter factor)                                     | DFNB39/F-TCF/HGFB/HPTA/SF                                                  |
| C05      | Hs.160562 | NM_000618    | IGF1    | Insulin-like growth factor 1 (somatomedin C)                                                 | IGF-I/IGFI/MGF                                                             |
| C06      | Hs.643120 | NM_000875    | IGF1R   | Insulin-like growth factor 1 receptor                                                        | CD221/IGFIR/IGFR/JTK13                                                     |
| C07      | Hs.706355 | NM_004517    | ILK     | Integrin-linked kinase                                                                       | HEL-S-28/ILK-1/ILK-2/P59/p59ILK                                            |
| C08      | Hs.440955 | NM_000885    | ITGA4   | Integrin, alpha 4 (antigen CD49D, alpha 4 subunit of VLA-4 receptor)                         | CD49D/IA4                                                                  |
| C09      | Hs.643813 | NM_002211    | ITGB1   | Integrin, beta 1 (fibronectin receptor, beta polypeptide, antigen CD29 includes MDF2, MSK12) | CD29/FNRB/GPIIA/MDF2/MSK12/VLA-BETA/VLAB                                   |
| C10      | Hs.375957 | NM_000211    | ITGB2   | Integrin, beta 2 (complement component 3 receptor 3 and 4 subunit)                           | CD18/LAD/LCAMB/LFA-1/MAC-1/MF17/MFI7                                       |
| C11      | Hs.218040 | NM_000212    | ITGB3   | Integrin, beta 3 (platelet glycoprotein IIIa, antigen CD61)                                  | BDPLT16/BDPLT2/CD61/GP3A/GPIIIa/GT                                         |
| C12      | Hs.647035 | NM_002314    | LIMK1   | LIM domain kinase 1                                                                          | LIMK/LIMK-1                                                                |
| D01      | Hs.431850 | NM_002745    | MAPK1   | Mitogen-activated protein kinase 1                                                           | ERK/ERK-2/ERK2/ERT1/MAPK2/P42MAPK/PRKM1/PRKM2/p38/p40/p41/p41mapk/p42-MAPK |
| D02      | Hs.132966 | NM_000245    | MET     | Met proto-oncogene (hepatocyte growth factor receptor)                                       | AUTS9/DFNB97/HGFR/RCCP2/c-Met                                              |
| D03      | Hs.2399   | NM_004995    | MMP14   | Matrix metalloproteinase 14 (membrane-inserted)                                              | MMP-14/MMP-X1/MT-MMP/MT-MMP 1/MT1-MMP/MT1MMP/MTMMP1/WNCHRS                 |
| D04      | Hs.513617 | NM_004530    | MMP2    | Matrix metalloproteinase 2 (gelatinase A, 72kDa gelatinase, 72kDa type IV collagenase)       | CLG4/CLG4A/MMP-2/MMP-II/MONA/TBE-1                                         |
| D05      | Hs.297413 | NM_004994    | MMP9    | Matrix metalloproteinase 9 (gelatinase B, 92kDa gelatinase, 92kDa type IV collagenase)       | CLG4B/GELB/MANDP2/MMP-9                                                    |
| D06      | Hs.713679 | NM_002444    | MSN     | Moesin                                                                                       | HEL70                                                                      |

| Position | Unigene   | Refseq    | Symbol   | Description                                                                             | Gname                                                    |
|----------|-----------|-----------|----------|-----------------------------------------------------------------------------------------|----------------------------------------------------------|
| D07      | Hs.16355  | NM_005964 | MYH10    | Myosin, heavy chain 10, non-muscle                                                      | NMMHC-IIB/NMMHCB                                         |
| D08      | Hs.474751 | NM_002473 | MYH9     | Myosin, heavy chain 9, non-muscle                                                       | BDPLT6/DFNA17/EPSTS/FTNS/MHA/NMHC-II-A/NMMHC-IIA/NMMHCA  |
| D09      | Hs.504687 | NM_006097 | MYL9     | Myosin, light chain 9, regulatory                                                       | LC20/MLC-2C/MLC2/MRLC1/MYRL2                             |
| D10      | Hs.477375 | NM_053025 | MYLK     | Myosin light chain kinase                                                               | AAT7/KRP/MLCK/MLCK1/MLCK108/MLCK210/MSTP083/MYLK1/smMLCK |
| D11      | Hs.435714 | NM_002576 | PAK1     | P21 protein (Cdc42/Rac)-activated kinase 1                                              | PAKalpha                                                 |
| D12      | Hs.20447  | NM_005884 | PAK4     | P21 protein (Cdc42/Rac)-activated kinase 4                                              | -                                                        |
| E01      | Hs.494691 | NM_005022 | PFN1     | Profilin 1                                                                              | ALS18                                                    |
| E02      | Hs.553498 | NM_006218 | PIK3CA   | Phosphoinositide-3-kinase, catalytic, alpha polypeptide                                 | CLOVE/CWS5/MCAP/MCM/MCMTC/PI3K/p110-alpha                |
| E03      | Hs.466871 | NM_002659 | PLAUR    | Plasminogen activator, urokinase receptor                                               | CD87/U-PAR/UPAR/URKR                                     |
| E04      | Hs.268177 | NM_002660 | PLCG1    | Phospholipase C, gamma 1                                                                | NCKAP3/PLC-II/PLC1/PLC148/PLCgamma1                      |
| E05      | Hs.732969 | NM_002662 | PLD1     | Phospholipase D1, phosphatidylcholine-specific                                          | -                                                        |
| E06      | Hs.531704 | NM_002737 | PRKCA    | Protein kinase C, alpha                                                                 | AAG6/PKC-alpha/PKCA/PRKACA                               |
| E07      | Hs.729457 | NM_000314 | PTEN     | Phosphatase and tensin homolog                                                          | 10q23del/BZS/CWS1/DEC/GLM2/MHAM/MMAC1/PTEN1/TEP1         |
| E08      | Hs.395482 | NM_005607 | PTK2     | PTK2 protein tyrosine kinase 2                                                          | FADK/FAK/FAK1/FRNK/PPP1R71/p125FAK/pp125FAK              |
| E09      | Hs.491322 | NM_004103 | PTK2B    | PTK2B protein tyrosine kinase 2 beta                                                    | CADTK/CAKB/FADK2/FAK2/PKB/PTK/PYK2/RAFTK                 |
| E10      | Hs.417549 | NM_002827 | PTPN1    | Protein tyrosine phosphatase, non-receptor type 1                                       | PTP1B                                                    |
| E11      | Hs.446336 | NM_002859 | PXN      | Paxillin                                                                                | -                                                        |
| E12      | Hs.413812 | NM_006908 | RAC1     | Ras-related C3 botulinum toxin substrate 1 (rho family, small GTP binding protein Rac1) | MIG5/Rac-1/TC-25/p21-Rac1                                |
| F01      | Hs.517601 | NM_002872 | RAC2     | Ras-related C3 botulinum toxin substrate 2 (rho family, small GTP binding protein Rac2) | EN-7/Gx/HSPC022/p21-Rac2                                 |
| F02      | Hs.664080 | NM_002890 | RASA1    | RAS p21 protein activator (GTPase activating protein) 1                                 | CM-AVM/CMAVM/GAP/PKWS/RASA/RASGAP/p120GAP/p120RASGAP     |
| F03      | Hs.263671 | NM_002906 | RDX      | Radixin                                                                                 | DFNB24                                                   |
| F04      | Hs.247565 | NM_000539 | RHO      | Rhodopsin                                                                               | CSNBAD1/OPN2/RP4                                         |
| F05      | Hs.247077 | NM_001664 | RHOA     | Ras homolog gene family, member A                                                       | ARH12/ARHA/RHO12/RHOH12                                  |
| F06      | Hs.502876 | NM_004040 | RHOB     | Ras homolog gene family, member B                                                       | ARH6/ARHB/MST081/MSTP081/RHOH6                           |
| F07      | Hs.502659 | NM_175744 | RHOC     | Ras homolog gene family, member C                                                       | ARH9/ARHC/H9/RHOH9                                       |
| F08      | Hs.6838   | NM_005168 | RND3     | Rho family GTPase 3                                                                     | ARHE/Rho8/RhoE/memB                                      |
| F09      | Hs.306307 | NM_005406 | ROCK1    | Rho-associated, coiled-coil containing protein kinase 1                                 | P160ROCK/ROCK-I                                          |
| F10      | Hs.678727 | NM_014631 | SH3PXD2A | SH3 and PX domains 2A                                                                   | FISH/SH3MD1/TKS5                                         |
| F11      | Hs.195659 | NM_005417 | SRC      | V-src sarcoma (Schmidt-Ruppin A-2) viral oncogene homolog (avian)                       | ASV/SRC1/c-SRC/p60-Src                                   |
| F12      | Hs.463059 | NM_003150 | STAT3    | Signal transducer and activator of transcription 3 (acute-phase response factor)        | ADMIO/APRF/HIES                                          |
| G01      | Hs.499209 | NM_003174 | SVIL     | Supervillin                                                                             | -                                                        |
| G02      | Hs.645227 | NM_000660 | TGFB1    | Transforming growth factor, beta 1                                                      | CED/DPD1/LAP/TGFB/TGFbeta                                |
| G03      | Hs.633514 | NM_003255 | TIMP2    | TIMP metalloproteinase inhibitor 2                                                      | CSC-21K/DDC8                                             |
| G04      | Hs.471014 | NM_006289 | TLN1     | Talin 1                                                                                 | ILWEQ/TLN                                                |
| G05      | Hs.515469 | NM_003370 | VASP     | Vasodilator-stimulated phosphoprotein                                                   | -                                                        |
| G06      | Hs.643896 | NM_003373 | VCL      | Vinculin                                                                                | CMD1W/CMH15/HEL114/MV/MVCL                               |
| G07      | Hs.73793  | NM_003376 | VEGFA    | Vascular endothelial growth factor A                                                    | MVCD1/VEGF/VPF                                           |
| G08      | Hs.455493 | NM_003380 | VIM      | Vimentin                                                                                | CTRCT30/HEL113                                           |
| G09      | Hs.75850  | NM_003931 | WASF1    | WAS protein family, member 1                                                            | SCAR1/WAVE/WAVE1                                         |
| G10      | Hs.512079 | NM_006990 | WASF2    | WAS protein family, member 2                                                            | IMD2/SCAR2/WASF4/WAVE2/dJ393P12.2                        |
| G11      | Hs.143728 | NM_003941 | WASL     | Wiskott-Aldrich syndrome-like                                                           | N-WASP/NWASP/WASPB                                       |
| G12      | Hs.128067 | NM_003387 | WIPF1    | WAS/WASL interacting protein family, member 1                                           | PRPL-2/WAS2/WASPIP/WIP                                   |
| H01      | Hs.520640 | NM_001101 | ACTB     | Actin, beta                                                                             | BRWS1/PS1TP5BP1                                          |

| Position | Unigene   | Refseq    | Symbol | Description                              | Gname                  |
|----------|-----------|-----------|--------|------------------------------------------|------------------------|
| H02      | Hs.534255 | NM_004048 | B2M    | Beta-2-microglobulin                     | -                      |
| H03      | Hs.592355 | NM_002046 | GAPDH  | Glyceraldehyde-3-phosphate dehydrogenase | G3PD/GAPD/HEL-S-162eP  |
| H04      | Hs.412707 | NM_000194 | HPRT1  | Hypoxanthine phosphoribosyltransferase 1 | HGPRT/HPRT             |
| H05      | Hs.546285 | NM_001002 | RPLP0  | Ribosomal protein, large, P0             | L10E/LP0/P0/PRLP0/RPP0 |
| H06      | N/A       |           | HGDC   | Human Genomic DNA Contamination          | HIGX1A                 |
| H07      | N/A       |           | NTC    | Positive PCR Control                     |                        |
| H08      | N/A       |           | NTC    |                                          |                        |
| H09      | N/A       |           | NTC    |                                          |                        |
| H10      | N/A       |           | PPC    | Positive PCR Control                     | PPC                    |
| H11      | N/A       |           | PPC    | Positive PCR Control                     | PPC                    |
| H12      | N/A       |           | PPC    | Positive PCR Control                     | PPC                    |

| Symbol   | Well | Test Sample |             |             |      |      |      |      |      |      |       | AVG   | SD   |
|----------|------|-------------|-------------|-------------|------|------|------|------|------|------|-------|-------|------|
|          |      | 20170730mic | 20170811mic | 20171120mic | exp4 | exp5 | exp6 | exp7 | exp8 | exp9 | exp10 |       |      |
| ACTN1    | A01  | 24.84       | 24.61       | 23.23       |      |      |      |      |      |      |       | 24.23 | 0.87 |
| ACTN3    | A02  | 36.64       | 34.55       | 33.43       |      |      |      |      |      |      |       | 34.33 | 0.81 |
| ACTN4    | A03  | 22.47       | 22.76       | 20.82       |      |      |      |      |      |      |       | 22.02 | 1.05 |
| ACTR2    | A04  | 26.77       | 27.3        | 23.89       |      |      |      |      |      |      |       | 25.99 | 1.84 |
| ACTR3    | A05  | 25.13       | 24.81       | 22.54       |      |      |      |      |      |      |       | 24.16 | 1.41 |
| AKT1     | A06  | 27.73       | 28.57       | 25.10       |      |      |      |      |      |      |       | 27.13 | 1.81 |
| ARF6     | A07  | 25.63       | 25.47       | 22.48       |      |      |      |      |      |      |       | 24.53 | 1.77 |
| ARHGDI A | A08  | 25.29       | 26.21       | 23.15       |      |      |      |      |      |      |       | 24.88 | 1.57 |
| ARHGEF7  | A09  | 30.74       | 31.14       | 27.51       |      |      |      |      |      |      |       | 29.80 | 1.99 |
| BAIAP2   | A10  | 33.02       | 34.25       | 30.20       |      |      |      |      |      |      |       | 32.49 | 2.08 |
| BCAR1    | A11  | 29.03       | 30.11       | 26.63       |      |      |      |      |      |      |       | 28.59 | 1.78 |
| CAPN1    | A12  | 25.78       | 25.79       | 24.13       |      |      |      |      |      |      |       | 25.23 | 0.96 |
| CAPN2    | B01  | 26.88       | 27.87       | 24.13       |      |      |      |      |      |      |       | 26.29 | 1.94 |
| CAV1     | B02  | 23.31       | 23.13       | 21.14       |      |      |      |      |      |      |       | 22.53 | 1.20 |
| CDC42    | B03  | 25.76       | 26.17       | 23.60       |      |      |      |      |      |      |       | 25.18 | 1.38 |
| CFL1     | B04  | 21.62       | 21.32       | 20.71       |      |      |      |      |      |      |       | 21.22 | 0.46 |
| CRK      | B05  | 27.23       | 26.84       | 24.30       |      |      |      |      |      |      |       | 26.12 | 1.59 |
| CSF1     | B06  | 26.13       | 27.29       | 21.90       |      |      |      |      |      |      |       | 25.11 | 2.84 |
| CTTN     | B07  | 27.29       | 27.57       | 25.05       |      |      |      |      |      |      |       | 26.64 | 1.38 |
| DIAPH1   | B08  | 27.29       | 28.17       | 25.28       |      |      |      |      |      |      |       | 26.91 | 1.48 |
| DPP4     | B09  | 35.16       | 33          | 30.53       |      |      |      |      |      |      |       | 32.84 | 2.24 |
| EGF      | B10  | 29.88       | 29.9        | 29.47       |      |      |      |      |      |      |       | 29.75 | 0.24 |
| EGFR     | B11  | 33.27       | 32.53       | 29.08       |      |      |      |      |      |      |       | 31.63 | 2.24 |
| ENAH     | B12  | 29.1        | 29.45       | 25.27       |      |      |      |      |      |      |       | 27.94 | 2.32 |
| EZR      | C01  | 26.83       | 26.82       | 24.17       |      |      |      |      |      |      |       | 25.94 | 1.53 |
| FAP      | C02  | 28.93       | 28.24       | 26.09       |      |      |      |      |      |      |       | 27.75 | 1.48 |
| FGF2     | C03  | 27.64       | 26.53       | 23.46       |      |      |      |      |      |      |       | 25.88 | 2.17 |
| HGF      | C04  | 32.15       | 33.46       | 29.60       |      |      |      |      |      |      |       | 31.74 | 1.96 |
| IGF1     | C05  | 33.81       | 35.32       | 31.05       |      |      |      |      |      |      |       | 33.29 | 2.03 |
| IGF1R    | C06  | 30.31       | 31.76       | 26.81       |      |      |      |      |      |      |       | 29.63 | 2.54 |
| ILK      | C07  | 25.56       | 25.77       | 24.01       |      |      |      |      |      |      |       | 25.11 | 0.96 |
| ITGA4    | C08  | 32.98       | 33.54       | 31.10       |      |      |      |      |      |      |       | 32.54 | 1.28 |
| ITGB1    | C09  | 33.95       | 31.69       | 30.57       |      |      |      |      |      |      |       | 32.07 | 1.72 |
| ITGB2    | C10  | 24.75       | 24.65       | 20.29       |      |      |      |      |      |      |       | 23.23 | 2.55 |
| ITGB3    | C11  | 27.77       | 29.47       | 28.04       |      |      |      |      |      |      |       | 28.43 | 0.91 |
| LIMK1    | C12  | 29.72       | 30.28       | 26.23       |      |      |      |      |      |      |       | 28.74 | 2.19 |
| MAPK1    | D01  | 31.69       | 32.02       | 31.03       |      |      |      |      |      |      |       | 31.58 | 0.50 |
| MET      | D02  | 28.25       | 28.3        | 25.18       |      |      |      |      |      |      |       | 27.24 | 1.79 |
| MMP14    | D03  | 30.93       | 30.64       | 26.52       |      |      |      |      |      |      |       | 29.36 | 2.47 |
| MMP2     | D04  | 27.77       | 28.69       | 24.94       |      |      |      |      |      |      |       | 27.13 | 1.95 |
| MMP9     | D05  | 27.58       | 27.49       | 23.88       |      |      |      |      |      |      |       | 26.32 | 2.11 |
| MSN      | D06  | 31.75       | 34.93       | 34.50       |      |      |      |      |      |      |       | 33.73 | 1.73 |
| MYH10    | D07  | 28.65       | 29.92       | 24.09       |      |      |      |      |      |      |       | 27.55 | 3.07 |
| MYH9     | D08  | 30.44       | 31.13       | 26.10       |      |      |      |      |      |      |       | 29.22 | 2.73 |
| MYL9     | D09  | 23.75       | 23.63       | 22.24       |      |      |      |      |      |      |       | 23.21 | 0.84 |
| MYLK     | D10  | 22.99       | 22.83       | 21.63       |      |      |      |      |      |      |       | 22.48 | 0.74 |
| PAK1     | D11  | 34.8        | 33.88       | 30.24       |      |      |      |      |      |      |       | 32.97 | 2.41 |
| PAK4     | D12  | 29.52       | 30.44       | 27.35       |      |      |      |      |      |      |       | 29.10 | 1.59 |
| PFN1     | E01  | 28.2        | 29.06       | 26.13       |      |      |      |      |      |      |       | 27.80 | 1.51 |
| PIK3CA   | E02  | 22.18       | 22.42       | 21.29       |      |      |      |      |      |      |       | 21.96 | 0.60 |
| PLAUR    | E03  | 30.16       | 30.06       | 26.44       |      |      |      |      |      |      |       | 28.89 | 2.12 |
| PLCG1    | E04  | 25.46       | 25.61       | 23.82       |      |      |      |      |      |      |       | 24.96 | 0.99 |
| PLD1     | E05  | 31.24       | 31.69       | 28.04       |      |      |      |      |      |      |       | 30.32 | 1.99 |
| PRKCA    | E06  | 31.69       | 31.18       | 28.25       |      |      |      |      |      |      |       | 30.37 | 1.86 |
| PTEN     | E07  | 30.11       | 30.05       | 28.24       |      |      |      |      |      |      |       | 29.47 | 1.06 |
| PTK2     | E08  | 26.85       | 26.88       | 23.98       |      |      |      |      |      |      |       | 25.90 | 1.67 |
| PTK2B    | E09  | 29.33       | 30.12       | 25.87       |      |      |      |      |      |      |       | 28.44 | 2.26 |
| PTPN1    | E10  | 29.2        | 29.82       | 28.27       |      |      |      |      |      |      |       | 29.10 | 0.78 |
| PXN      | E11  | 30.3        | 31.32       | 26.92       |      |      |      |      |      |      |       | 29.51 | 2.30 |
| RAC1     | E12  | 29.9        | 31.69       | 26.33       |      |      |      |      |      |      |       | 29.31 | 2.73 |
| RAC2     | F01  | 25.24       | 25.24       | 23.56       |      |      |      |      |      |      |       | 24.68 | 0.97 |
| RASA1    | F02  | 31.86       | 31.92       | 29.15       |      |      |      |      |      |      |       | 30.98 | 1.58 |
| RDX      | F03  | 29.49       | 30.03       | 25.93       |      |      |      |      |      |      |       | 28.48 | 2.23 |
| RHO      | F04  | 26.81       | 26.18       | 24.07       |      |      |      |      |      |      |       | 25.69 | 1.44 |
| RHOA     | F05  | 36.57       | 34.84       | 32.65       |      |      |      |      |      |      |       | 34.16 | 1.31 |
| RHOB     | F06  | 23.13       | 23.67       | 21.01       |      |      |      |      |      |      |       | 22.60 | 1.41 |
| RHOC     | F07  | 26.48       | 27.33       | 23.96       |      |      |      |      |      |      |       | 25.92 | 1.75 |
| RND3     | F08  | 23.65       | 24.17       | 21.99       |      |      |      |      |      |      |       | 23.27 | 1.14 |
| ROCK1    | F09  | 26.19       | 25.55       | 22.66       |      |      |      |      |      |      |       | 24.80 | 1.88 |
| SH3PXD2A | F10  | 28.56       | 28.7        | 25.05       |      |      |      |      |      |      |       | 27.44 | 2.07 |
| SRC      | F11  | 30.25       | 30.84       | 26.31       |      |      |      |      |      |      |       | 29.13 | 2.46 |
| STAT3    | F12  | 29.96       | 29.34       | 28.86       |      |      |      |      |      |      |       | 29.39 | 0.55 |

| Symbol | Well | Test Sample |             |             |      |      |      |      |      |      |       | AVG   | SD   |
|--------|------|-------------|-------------|-------------|------|------|------|------|------|------|-------|-------|------|
|        |      | 20170730mic | 20170811mic | 20171120mic | exp4 | exp5 | exp6 | exp7 | exp8 | exp9 | exp10 |       |      |
| SVIL   | G01  | 25.69       | 26.33       | 23.70       |      |      |      |      |      |      |       | 25.24 | 1.37 |
| TGFB1  | G02  | 26.17       | 26.07       | 24.12       |      |      |      |      |      |      |       | 25.45 | 1.16 |
| TIMP2  | G03  | 26.62       | 27.11       | 23.70       |      |      |      |      |      |      |       | 25.81 | 1.84 |
| TLN1   | G04  | 25.46       | 25.52       | 23.02       |      |      |      |      |      |      |       | 24.67 | 1.43 |
| VASP   | G05  | 29.46       | 30.44       | 23.83       |      |      |      |      |      |      |       | 27.91 | 3.57 |
| VCL    | G06  | 27.65       | 28.01       | 25.88       |      |      |      |      |      |      |       | 27.18 | 1.14 |
| VEGFA  | G07  | 29.09       | 30.62       | 24.98       |      |      |      |      |      |      |       | 28.23 | 2.92 |
| VIM    | G08  | 26          | 26.5        | 22.30       |      |      |      |      |      |      |       | 24.93 | 2.29 |
| WASF1  | G09  | 30.82       | 31.57       | 29.83       |      |      |      |      |      |      |       | 30.74 | 0.87 |
| WASF2  | G10  | 28.9        | 28.92       | 26.48       |      |      |      |      |      |      |       | 28.10 | 1.40 |
| WASL   | G11  | 28.81       | 29.92       | 25.84       |      |      |      |      |      |      |       | 28.19 | 2.11 |
| WIPF1  | G12  | 27.68       | 28.14       | 24.67       |      |      |      |      |      |      |       | 26.83 | 1.88 |
| ACTB   | H01  | 19.03       | 18.94       | 17.88       |      |      |      |      |      |      |       | 18.62 | 0.64 |
| B2M    | H02  | 21.3        | 20.89       | 19.88       |      |      |      |      |      |      |       | 20.69 | 0.73 |
| GAPDH  | H03  | 27.87       | 27.71       | 25.90       |      |      |      |      |      |      |       | 27.16 | 1.09 |
| HPRT1  | H04  | 21.19       | 21.24       | 18.04       |      |      |      |      |      |      |       | 20.16 | 1.83 |
| RPLP0  | H05  | 18.96       | 19.27       | 18.24       |      |      |      |      |      |      |       | 18.82 | 0.53 |
| HGDC   | H06  | 36.91       | 37.14       | 33.01       |      |      |      |      |      |      |       | 34.34 | 1.15 |
| NTC    | H07  |             |             |             |      |      |      |      |      |      |       |       |      |
| NTC    | H08  |             |             |             |      |      |      |      |      |      |       |       |      |
| NTC    | H09  |             |             |             |      |      |      |      |      |      |       |       |      |
| PPC    | H10  | 24.58       | 24.7        | 24.75       |      |      |      |      |      |      |       | 24.68 | 0.09 |
| PPC    | H11  | 24.61       | 24.7        | 24.65       |      |      |      |      |      |      |       | 24.65 | 0.05 |
| PPC    | H12  | 24.5        | 24.72       | 24.77       |      |      |      |      |      |      |       | 24.66 | 0.14 |

| C <sub>t</sub> Range                          | Distribution of C <sub>t</sub> Values |      |      |      |      |      |      |      |      |       | AVG | STD  |
|-----------------------------------------------|---------------------------------------|------|------|------|------|------|------|------|------|-------|-----|------|
|                                               | exp1                                  | exp2 | exp3 | exp4 | exp5 | exp6 | exp7 | exp8 | exp9 | exp10 |     |      |
| <25                                           | 17                                    | 18   | 46   |      |      |      |      |      |      |       | 27  | 16.5 |
| 25-30                                         | 51                                    | 42   | 36   |      |      |      |      |      |      |       | 43  | 7.5  |
| 30-35                                         | 21                                    | 31   | 11   |      |      |      |      |      |      |       | 21  | 10.0 |
| Absent Calls                                  | 7                                     | 5    | 3    |      |      |      |      |      |      |       | 5   | 2.0  |
| Percent Distribution of C <sub>t</sub> Values |                                       |      |      |      |      |      |      |      |      |       |     |      |
| <25                                           | 18%                                   | 19%  | 48%  |      |      |      |      |      |      |       | 28% | 17%  |
| 25-30                                         | 53%                                   | 44%  | 38%  |      |      |      |      |      |      |       | 45% | 8%   |
| 30-35                                         | 22%                                   | 32%  | 11%  |      |      |      |      |      |      |       | 22% | 10%  |
| Absent Calls                                  | 7%                                    | 5%   | 3%   |      |      |      |      |      |      |       | 5%  | 2%   |

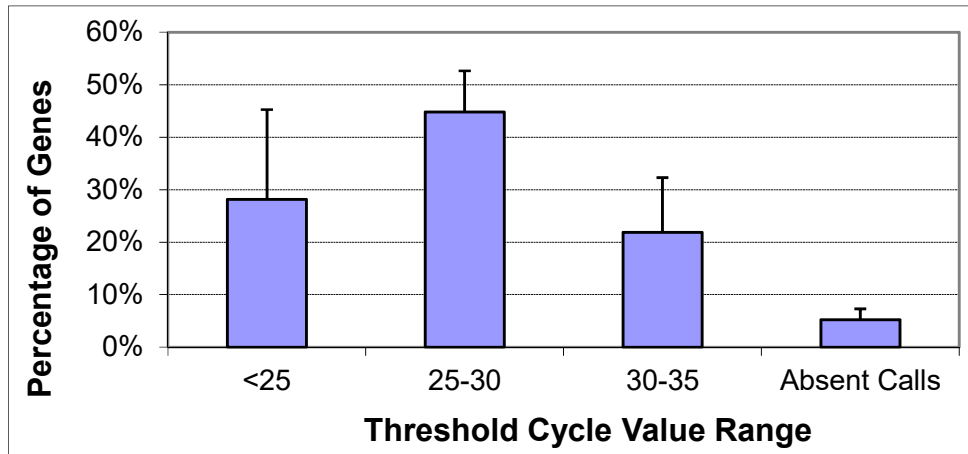

| Symbol   | Well | Control Sample |            |            |      |      |      |      |      |      |       | AVG   | SD   |
|----------|------|----------------|------------|------------|------|------|------|------|------|------|-------|-------|------|
|          |      | 20170730CK     | 20170811CK | 20171120CK | exp4 | exp5 | exp6 | exp7 | exp8 | exp9 | exp10 |       |      |
| ACTN1    | A01  | 24.62          | 24.46      | 22.73      |      |      |      |      |      |      |       | 23.94 | 1.05 |
| ACTN3    | A02  | 35.55          | 33.08      | 31.42      |      |      |      |      |      |      |       | 33.17 | 1.79 |
| ACTN4    | A03  | 22.11          | 21.98      | 20.48      |      |      |      |      |      |      |       | 21.52 | 0.91 |
| ACTR2    | A04  | 26.44          | 26.15      | 23.10      |      |      |      |      |      |      |       | 25.23 | 1.85 |
| ACTR3    | A05  | 24.34          | 23.54      | 21.84      |      |      |      |      |      |      |       | 23.24 | 1.28 |
| AKT1     | A06  | 27.04          | 24.95      | 24.52      |      |      |      |      |      |      |       | 25.50 | 1.35 |
| ARF6     | A07  | 24.58          | 23.70      | 22.13      |      |      |      |      |      |      |       | 23.47 | 1.24 |
| ARHGDI1A | A08  | 25.03          | 23.71      | 22.51      |      |      |      |      |      |      |       | 23.75 | 1.26 |
| ARHGEF7  | A09  | 30.33          | 28.71      | 27.18      |      |      |      |      |      |      |       | 28.74 | 1.58 |
| BAIAP2   | A10  | 32.57          | 30.06      | 28.56      |      |      |      |      |      |      |       | 30.40 | 2.03 |
| BCAR1    | A11  | 29.04          | 26.79      | 26.11      |      |      |      |      |      |      |       | 27.31 | 1.53 |
| CAPN1    | A12  | 25.22          | 25.21      | 24.04      |      |      |      |      |      |      |       | 24.82 | 0.68 |
| CAPN2    | B01  | 26.64          | 24.52      | 23.54      |      |      |      |      |      |      |       | 24.90 | 1.58 |
| CAV1     | B02  | 22.78          | 21.70      | 20.56      |      |      |      |      |      |      |       | 21.68 | 1.11 |
| CDC42    | B03  | 24.92          | 24.62      | 23.00      |      |      |      |      |      |      |       | 24.18 | 1.03 |
| CFL1     | B04  | 20.56          | 20.30      | 20.06      |      |      |      |      |      |      |       | 20.31 | 0.25 |
| CRK      | B05  | 26.01          | 25.65      | 24.09      |      |      |      |      |      |      |       | 25.25 | 1.02 |
| CSF1     | B06  | 25.21          | 22.94      | 22.67      |      |      |      |      |      |      |       | 23.61 | 1.40 |
| CTTN     | B07  | 26.72          | 25.32      | 24.20      |      |      |      |      |      |      |       | 25.41 | 1.26 |
| DIAPH1   | B08  | 26.85          | 26.70      | 24.34      |      |      |      |      |      |      |       | 25.96 | 1.41 |
| DPP4     | B09  | 32.61          | 31.15      | 29.73      |      |      |      |      |      |      |       | 31.16 | 1.44 |
| EGF      | B10  | 29.68          | 28.88      | 28.80      |      |      |      |      |      |      |       | 29.12 | 0.49 |
| EGFR     | B11  | 31.83          | 29.00      | 29.45      |      |      |      |      |      |      |       | 30.09 | 1.52 |
| ENAH     | B12  | 28.86          | 25.72      | 24.82      |      |      |      |      |      |      |       | 26.47 | 2.12 |
| EZR      | C01  | 25.52          | 26.04      | 23.45      |      |      |      |      |      |      |       | 25.00 | 1.37 |
| FAP      | C02  | 27.81          | 27.01      | 25.60      |      |      |      |      |      |      |       | 26.81 | 1.12 |
| FGF2     | C03  | 26.17          | 24.51      | 23.84      |      |      |      |      |      |      |       | 24.84 | 1.20 |
| HGF      | C04  | 32.12          | 31.53      | 28.53      |      |      |      |      |      |      |       | 30.73 | 1.93 |
| IGF1     | C05  | 33.83          | 34.07      | 31.48      |      |      |      |      |      |      |       | 33.13 | 1.43 |
| IGF1R    | C06  | 30.32          | 27.23      | 25.50      |      |      |      |      |      |      |       | 27.68 | 2.44 |
| ILK      | C07  | 24.89          | 24.67      | 23.50      |      |      |      |      |      |      |       | 24.35 | 0.75 |
| ITGA4    | C08  | 33.64          | 32.90      | 30.26      |      |      |      |      |      |      |       | 32.27 | 1.78 |
| ITGB1    | C09  | 32.60          | 30.44      | 29.26      |      |      |      |      |      |      |       | 30.77 | 1.69 |
| ITGB2    | C10  | 23.97          | 21.23      | 20.13      |      |      |      |      |      |      |       | 21.78 | 1.98 |
| ITGB3    | C11  | 28.56          | 29.45      | 27.46      |      |      |      |      |      |      |       | 28.49 | 1.00 |
| LIMK1    | C12  | 28.70          | 29.69      | 27.66      |      |      |      |      |      |      |       | 28.68 | 1.02 |
| MAPK1    | D01  | 31.53          | 29.85      | 30.15      |      |      |      |      |      |      |       | 30.51 | 0.90 |
| MET      | D02  | 27.32          | 26.34      | 24.65      |      |      |      |      |      |      |       | 26.10 | 1.35 |
| MMP14    | D03  | 29.76          | 27.27      | 25.21      |      |      |      |      |      |      |       | 27.41 | 2.28 |
| MMP2     | D04  | 27.04          | 26.27      | 24.63      |      |      |      |      |      |      |       | 25.98 | 1.23 |
| MMP9     | D05  | 26.92          | 23.76      | 24.79      |      |      |      |      |      |      |       | 25.16 | 1.61 |
| MSN      | D06  | 31.77          | 34.81      | 30.62      |      |      |      |      |      |      |       | 32.40 | 2.16 |
| MYH10    | D07  | 28.09          | 24.77      | 22.99      |      |      |      |      |      |      |       | 25.28 | 2.59 |
| MYH9     | D08  | 30.45          | 27.45      | 25.98      |      |      |      |      |      |      |       | 27.96 | 2.28 |
| MYL9     | D09  | 23.54          | 22.52      | 21.07      |      |      |      |      |      |      |       | 22.38 | 1.24 |
| MYLK     | D10  | 22.72          | 21.80      | 20.46      |      |      |      |      |      |      |       | 21.66 | 1.14 |
| PAK1     | D11  | 33.64          | 29.85      | 28.84      |      |      |      |      |      |      |       | 30.78 | 2.53 |
| PAK4     | D12  | 29.09          | 28.31      | 26.53      |      |      |      |      |      |      |       | 27.98 | 1.31 |
| PFN1     | E01  | 27.85          | 27.15      | 25.57      |      |      |      |      |      |      |       | 26.86 | 1.17 |
| PIK3CA   | E02  | 21.50          | 22.20      | 20.55      |      |      |      |      |      |      |       | 21.42 | 0.83 |
| PLAUR    | E03  | 29.33          | 27.62      | 25.94      |      |      |      |      |      |      |       | 27.63 | 1.70 |
| PLCG1    | E04  | 24.91          | 26.02      | 23.92      |      |      |      |      |      |      |       | 24.95 | 1.05 |
| PLD1     | E05  | 30.70          | 28.64      | 27.63      |      |      |      |      |      |      |       | 28.99 | 1.56 |
| PRKCA    | E06  | 30.28          | 29.27      | 29.31      |      |      |      |      |      |      |       | 29.62 | 0.57 |
| PTEN     | E07  | 29.78          | 28.57      | 27.43      |      |      |      |      |      |      |       | 28.59 | 1.18 |
| PTK2     | E08  | 26.45          | 24.89      | 24.28      |      |      |      |      |      |      |       | 25.21 | 1.12 |
| PTK2B    | E09  | 29.08          | 26.82      | 25.57      |      |      |      |      |      |      |       | 27.16 | 1.78 |
| PTPN1    | E10  | 29.18          | 29.30      | 28.26      |      |      |      |      |      |      |       | 28.91 | 0.57 |
| PXN      | E11  | 30.06          | 28.04      | 26.13      |      |      |      |      |      |      |       | 28.08 | 1.97 |
| RAC1     | E12  | 29.97          | 27.04      | 25.01      |      |      |      |      |      |      |       | 27.34 | 2.49 |
| RAC2     | F01  | 24.50          | 24.29      | 22.91      |      |      |      |      |      |      |       | 23.90 | 0.86 |
| RASA1    | F02  | 31.75          | 30.01      | 29.50      |      |      |      |      |      |      |       | 30.42 | 1.18 |
| RDX      | F03  | 29.23          | 27.69      | 25.62      |      |      |      |      |      |      |       | 27.51 | 1.81 |
| RHO      | F04  | 26.06          | 25.02      | 23.72      |      |      |      |      |      |      |       | 24.93 | 1.17 |
| RHOA     | F05  | 34.78          | 35.90      | 31.24      |      |      |      |      |      |      |       | 33.67 | 2.11 |
| RHOB     | F06  | 22.81          | 21.93      | 20.25      |      |      |      |      |      |      |       | 21.66 | 1.30 |
| RHOC     | F07  | 26.58          | 24.03      | 23.27      |      |      |      |      |      |      |       | 24.63 | 1.73 |
| RND3     | F08  | 23.06          | 22.63      | 21.73      |      |      |      |      |      |      |       | 22.47 | 0.68 |
| ROCK1    | F09  | 24.89          | 23.68      | 23.02      |      |      |      |      |      |      |       | 23.86 | 0.95 |
| SH3PXD2A | F10  | 28.22          | 27.14      | 24.62      |      |      |      |      |      |      |       | 26.66 | 1.85 |
| SRC      | F11  | 30.02          | 27.01      | 26.08      |      |      |      |      |      |      |       | 27.70 | 2.06 |
| STAT3    | F12  | 29.52          | 28.57      | 28.06      |      |      |      |      |      |      |       | 28.72 | 0.74 |



| Symbol | Well | Control Sample |            |            |      |      |      |      |      |      |       | AVG   | SD   |
|--------|------|----------------|------------|------------|------|------|------|------|------|------|-------|-------|------|
|        |      | 20170730CK     | 20170811CK | 20171120CK | exp4 | exp5 | exp6 | exp7 | exp8 | exp9 | exp10 |       |      |
| SVIL   | G01  | 25.11          | 24.74      | 23.58      |      |      |      |      |      |      |       | 24.48 | 0.80 |
| TGFB1  | G02  | 25.43          | 25.48      | 23.92      |      |      |      |      |      |      |       | 24.94 | 0.89 |
| TIMP2  | G03  | 26.30          | 24.34      | 22.60      |      |      |      |      |      |      |       | 24.41 | 1.85 |
| TLN1   | G04  | 25.08          | 23.13      | 22.27      |      |      |      |      |      |      |       | 23.49 | 1.44 |
| VASP   | G05  | 29.04          | 25.13      | 22.72      |      |      |      |      |      |      |       | 25.63 | 3.19 |
| VCL    | G06  | 27.50          | 26.52      | 25.04      |      |      |      |      |      |      |       | 26.35 | 1.24 |
| VEGFA  | G07  | 29.77          | 26.03      | 23.87      |      |      |      |      |      |      |       | 26.56 | 2.99 |
| VIM    | G08  | 25.21          | 23.72      | 22.65      |      |      |      |      |      |      |       | 23.86 | 1.29 |
| WASF1  | G09  | 31.22          | 30.01      | 29.97      |      |      |      |      |      |      |       | 30.40 | 0.71 |
| WASF2  | G10  | 28.98          | 28.07      | 26.34      |      |      |      |      |      |      |       | 27.80 | 1.34 |
| WASL   | G11  | 28.46          | 26.89      | 25.21      |      |      |      |      |      |      |       | 26.85 | 1.63 |
| WIPF1  | G12  | 27.00          | 25.92      | 24.84      |      |      |      |      |      |      |       | 25.92 | 1.08 |
| ACTB   | H01  | 18.76          | 18.80      | 17.08      |      |      |      |      |      |      |       | 18.21 | 0.98 |
| B2M    | H02  | 19.93          | 20.14      | 20.17      |      |      |      |      |      |      |       | 20.08 | 0.13 |
| GAPDH  | H03  | 26.74          | 27.03      | 25.22      |      |      |      |      |      |      |       | 26.33 | 0.97 |
| HPRT1  | H04  | 20.13          | 18.79      | 18.05      |      |      |      |      |      |      |       | 18.99 | 1.05 |
| RPLP0  | H05  | 18.33          | 18.69      | 18.26      |      |      |      |      |      |      |       | 18.43 | 0.23 |
| HGDC   | H06  | 36.12          | 37.33      | 31.23      |      |      |      |      |      |      |       | 33.74 | 2.18 |
| NTC    | H07  |                |            |            |      |      |      |      |      |      |       |       |      |
| NTC    | H08  |                |            |            |      |      |      |      |      |      |       |       |      |
| NTC    | H09  |                |            |            |      |      |      |      |      |      |       |       |      |
| PPC    | H10  | 24.75          | 24.86      | 24.98      |      |      |      |      |      |      |       | 24.86 | 0.12 |
| PPC    | H11  | 24.75          | 24.74      | 24.90      |      |      |      |      |      |      |       | 24.80 | 0.09 |
| PPC    | H12  | 23.73          | 22.70      | 24.80      |      |      |      |      |      |      |       | 23.74 | 1.05 |

| C <sub>t</sub> Range                          | Distribution of C <sub>t</sub> Values |      |      |      |      |      |      |      |      |       | AVG | STD  |
|-----------------------------------------------|---------------------------------------|------|------|------|------|------|------|------|------|-------|-----|------|
|                                               | exp1                                  | exp2 | exp3 | exp4 | exp5 | exp6 | exp7 | exp8 | exp9 | exp10 |     |      |
| <25                                           | 24                                    | 36   | 52   |      |      |      |      |      |      |       | 37  | 14.0 |
| 25-30                                         | 47                                    | 45   | 34   |      |      |      |      |      |      |       | 42  | 7.0  |
| 30-35                                         | 20                                    | 10   | 7    |      |      |      |      |      |      |       | 12  | 6.8  |
| Absent Calls                                  | 5                                     | 5    | 3    |      |      |      |      |      |      |       | 4   | 1.2  |
| Percent Distribution of C <sub>t</sub> Values |                                       |      |      |      |      |      |      |      |      |       |     |      |
| <25                                           | 25%                                   | 38%  | 54%  |      |      |      |      |      |      |       | 39% | 15%  |
| 25-30                                         | 49%                                   | 47%  | 35%  |      |      |      |      |      |      |       | 44% | 7%   |
| 30-35                                         | 21%                                   | 10%  | 7%   |      |      |      |      |      |      |       | 13% | 7%   |
| Absent Calls                                  | 5%                                    | 5%   | 3%   |      |      |      |      |      |      |       | 5%  | 1%   |

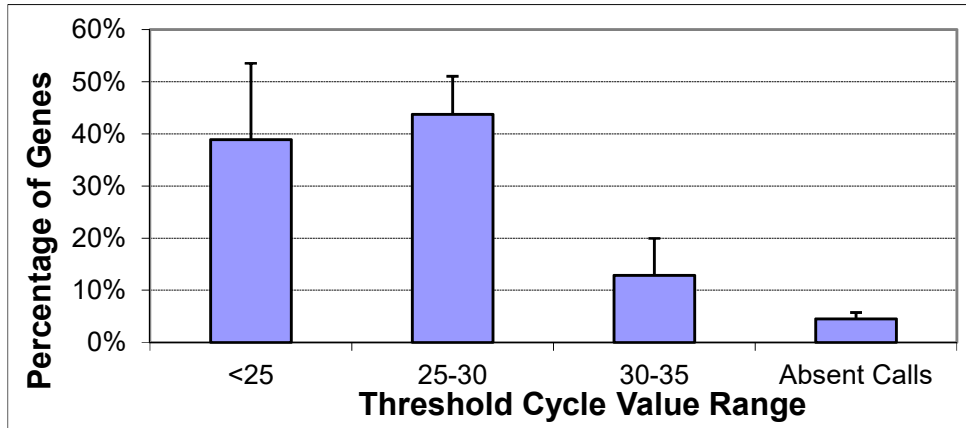

| Housekeeping Gene Symbol |
|--------------------------|
| ACTB                     |
| RPLP0                    |

| Well | Test Sample |             |             |
|------|-------------|-------------|-------------|
|      | 20170730mic | 20170811mic | 20171120mic |
| H01  | 19.03       | 18.94       | 17.88       |
| H05  | 18.96       | 19.27       | 18.24       |

|            |        |        |       |
|------------|--------|--------|-------|
| <b>AVG</b> | 18.995 | 19.105 | 18.06 |
|------------|--------|--------|-------|

| Housekeeping Gene Symbol |
|--------------------------|
| ACTB                     |
| RPLP0                    |

| Well | Control Sample |            |            |
|------|----------------|------------|------------|
|      | 20170730CK     | 20170811CK | 20171120CK |
| H01  | 18.76          | 18.8       | 17.08      |
| H05  | 18.33          | 18.69      | 18.26      |

|            |        |        |       |
|------------|--------|--------|-------|
| <b>AVG</b> | 18.545 | 18.745 | 17.67 |
|------------|--------|--------|-------|

| Symbol   | Well | AVG $\Delta C_t$<br>(Ct(GOI) - Ave Ct) |                | $2^{\Delta-\Delta C_t}$ |                | Fold Change                 | T-TEST   | Fold Up- or Down-<br>Regulation | Comments |
|----------|------|----------------------------------------|----------------|-------------------------|----------------|-----------------------------|----------|---------------------------------|----------|
|          |      | Test Sample                            | Control Sample | Test Sample             | Control Sample | Test Sample /Control Sample | p value  | Test Sample /Control Sample     |          |
| ACTN1    | A01  | 5.51                                   | 5.62           | 2.2E-02                 | 2.0E-02        | 1.08                        | 0.847027 | 1.08                            | OKAY     |
| ACTN3    | A02  | 15.61                                  | 14.85          | 2.0E-05                 | 3.4E-05        | <b>0.59</b>                 | 0.261094 | <b>-1.69</b>                    | B        |
| ACTN4    | A03  | 3.30                                   | 3.20           | 1.0E-01                 | 1.1E-01        | 0.94                        | 0.850616 | -1.07                           | OKAY     |
| ACTR2    | A04  | 7.27                                   | 6.91           | 6.5E-03                 | 8.3E-03        | 0.78                        | 0.750695 | -1.28                           | OKAY     |
| ACTR3    | A05  | 5.44                                   | 4.92           | 2.3E-02                 | 3.3E-02        | 0.70                        | 0.507893 | -1.43                           | OKAY     |
| AKT1     | A06  | 8.41                                   | 7.18           | 2.9E-03                 | 6.9E-03        | <b>0.43</b>                 | 0.282590 | <b>-2.35</b>                    | OKAY     |
| ARF6     | A07  | 5.81                                   | 5.15           | 1.8E-02                 | 2.8E-02        | <b>0.63</b>                 | 0.616155 | <b>-1.58</b>                    | OKAY     |
| ARHGDI3  | A08  | 6.16                                   | 5.43           | 1.4E-02                 | 2.3E-02        | <b>0.60</b>                 | 0.392588 | <b>-1.66</b>                    | OKAY     |
| ARHGEF7  | A09  | 11.08                                  | 10.42          | 4.6E-04                 | 7.3E-04        | <b>0.63</b>                 | 0.668589 | <b>-1.58</b>                    | OKAY     |
| BAIAP2   | A10  | 13.77                                  | 12.08          | 7.2E-05                 | 2.3E-04        | <b>0.31</b>                 | 0.213536 | <b>-3.23</b>                    | B        |
| BCAR1    | A11  | 9.87                                   | 8.99           | 1.1E-03                 | 2.0E-03        | <b>0.54</b>                 | 0.385396 | <b>-1.84</b>                    | OKAY     |
| CAPN1    | A12  | 6.51                                   | 6.50           | 1.1E-02                 | 1.1E-02        | 0.99                        | 0.939499 | -1.01                           | OKAY     |
| CAPN2    | B01  | 7.57                                   | 6.58           | 5.3E-03                 | 1.0E-02        | <b>0.50</b>                 | 0.390931 | <b>-1.99</b>                    | OKAY     |
| CAV1     | B02  | 3.81                                   | 3.36           | 7.1E-02                 | 9.7E-02        | 0.73                        | 0.437995 | -1.36                           | OKAY     |
| CDC42    | B03  | 6.46                                   | 5.86           | 1.1E-02                 | 1.7E-02        | <b>0.66</b>                 | 0.413870 | <b>-1.51</b>                    | OKAY     |
| CFL1     | B04  | 2.50                                   | 1.99           | 1.8E-01                 | 2.5E-01        | 0.70                        | 0.163388 | -1.42                           | OKAY     |
| CRK      | B05  | 7.40                                   | 6.93           | 5.9E-03                 | 8.2E-03        | 0.72                        | 0.698626 | -1.39                           | OKAY     |
| CSF1     | B06  | 6.39                                   | 5.29           | 1.2E-02                 | 2.6E-02        | <b>0.47</b>                 | 0.848826 | <b>-2.14</b>                    | OKAY     |
| CTTN     | B07  | 7.92                                   | 7.09           | 4.1E-03                 | 7.3E-03        | <b>0.57</b>                 | 0.278553 | <b>-1.77</b>                    | OKAY     |
| DIAPH1   | B08  | 8.19                                   | 7.64           | 3.4E-03                 | 5.0E-03        | 0.68                        | 0.528554 | -1.46                           | OKAY     |
| DPP4     | B09  | 14.12                                  | 12.84          | 5.6E-05                 | 1.4E-04        | <b>0.41</b>                 | 0.358651 | <b>-2.43</b>                    | B        |
| EGF      | B10  | 11.03                                  | 10.80          | 4.8E-04                 | 5.6E-04        | 0.85                        | 0.539605 | -1.17                           | OKAY     |
| EGFR     | B11  | 12.91                                  | 11.77          | 1.3E-04                 | 2.9E-04        | <b>0.46</b>                 | 0.491358 | <b>-2.19</b>                    | B        |
| ENAH     | B12  | 9.22                                   | 8.15           | 1.7E-03                 | 3.5E-03        | <b>0.48</b>                 | 0.459410 | <b>-2.10</b>                    | OKAY     |
| EZR      | C01  | 7.22                                   | 6.68           | 6.7E-03                 | 9.7E-03        | 0.69                        | 0.582549 | -1.45                           | OKAY     |
| FAP      | C02  | 9.03                                   | 8.49           | 1.9E-03                 | 2.8E-03        | 0.68                        | 0.518679 | -1.46                           | OKAY     |
| FGF2     | C03  | 7.16                                   | 6.52           | 7.0E-03                 | 1.1E-02        | <b>0.64</b>                 | 0.827430 | <b>-1.55</b>                    | OKAY     |
| HGF      | C04  | 13.02                                  | 12.41          | 1.2E-04                 | 1.8E-04        | <b>0.66</b>                 | 0.622003 | <b>-1.53</b>                    | B        |
| IGF1     | C05  | 14.57                                  | 14.81          | 4.1E-05                 | 3.5E-05        | 1.18                        | 0.638645 | 1.18                            | B        |
| IGF1R    | C06  | 10.91                                  | 9.36           | 5.2E-04                 | 1.5E-03        | <b>0.34</b>                 | 0.328344 | <b>-2.91</b>                    | OKAY     |
| ILK      | C07  | 6.39                                   | 6.03           | 1.2E-02                 | 1.5E-02        | 0.78                        | 0.273902 | -1.28                           | OKAY     |
| ITGA4    | C08  | 13.82                                  | 13.95          | 6.9E-05                 | 6.3E-05        | 1.09                        | 0.892898 | 1.09                            | B        |
| ITGB1    | C09  | 13.35                                  | 12.45          | 9.6E-05                 | 1.8E-04        | <b>0.53</b>                 | 0.331409 | <b>-1.87</b>                    | B        |
| ITGB2    | C10  | 4.51                                   | 3.46           | 4.4E-02                 | 9.1E-02        | <b>0.48</b>                 | 0.627657 | <b>-2.08</b>                    | OKAY     |
| ITGB3    | C11  | 9.71                                   | 10.17          | 1.2E-03                 | 8.7E-04        | 1.38                        | 0.423004 | 1.38                            | OKAY     |
| LIMK1    | C12  | 10.02                                  | 10.36          | 9.6E-04                 | 7.6E-04        | 1.27                        | 0.516677 | 1.27                            | OKAY     |
| MAPK1    | D01  | 12.86                                  | 12.19          | 1.3E-04                 | 2.1E-04        | <b>0.63</b>                 | 0.323745 | <b>-1.59</b>                    | B        |
| MET      | D02  | 8.52                                   | 7.78           | 2.7E-03                 | 4.5E-03        | <b>0.60</b>                 | 0.546792 | <b>-1.67</b>                    | OKAY     |
| MMP14    | D03  | 10.64                                  | 9.09           | 6.3E-04                 | 1.8E-03        | <b>0.34</b>                 | 0.366564 | <b>-2.93</b>                    | OKAY     |
| MMP2     | D04  | 8.41                                   | 7.66           | 2.9E-03                 | 4.9E-03        | <b>0.59</b>                 | 0.636548 | <b>-1.69</b>                    | OKAY     |
| MMP9     | D05  | 7.60                                   | 6.84           | 5.2E-03                 | 8.7E-03        | <b>0.59</b>                 | 0.584713 | <b>-1.69</b>                    | OKAY     |
| MSN      | D06  | 15.01                                  | 14.08          | 3.0E-05                 | 5.8E-05        | <b>0.53</b>                 | 0.685823 | <b>-1.90</b>                    | B        |
| MYH10    | D07  | 8.83                                   | 6.96           | 2.2E-03                 | 8.0E-03        | <b>0.27</b>                 | 0.383263 | <b>-3.66</b>                    | OKAY     |
| MYH9     | D08  | 10.50                                  | 9.64           | 6.9E-04                 | 1.3E-03        | <b>0.55</b>                 | 0.762574 | <b>-1.82</b>                    | OKAY     |
| MYL9     | D09  | 4.49                                   | 4.06           | 4.5E-02                 | 6.0E-02        | 0.74                        | 0.335211 | -1.35                           | OKAY     |
| MYLK     | D10  | 3.76                                   | 3.34           | 7.4E-02                 | 9.9E-02        | 0.75                        | 0.299589 | -1.34                           | OKAY     |
| PAK1     | D11  | 14.25                                  | 12.46          | 5.1E-05                 | 1.8E-04        | <b>0.29</b>                 | 0.229202 | <b>-3.47</b>                    | B        |
| PAK4     | D12  | 10.38                                  | 9.66           | 7.5E-04                 | 1.2E-03        | <b>0.60</b>                 | 0.430920 | <b>-1.65</b>                    | OKAY     |
| PFN1     | E01  | 9.08                                   | 8.54           | 1.9E-03                 | 2.7E-03        | 0.69                        | 0.528321 | -1.45                           | OKAY     |
| PIK3CA   | E02  | 3.24                                   | 3.10           | 1.1E-01                 | 1.2E-01        | 0.90                        | 0.410644 | -1.11                           | OKAY     |
| PLAUR    | E03  | 10.17                                  | 9.31           | 8.7E-04                 | 1.6E-03        | <b>0.55</b>                 | 0.592874 | <b>-1.81</b>                    | OKAY     |
| PLCG1    | E04  | 6.24                                   | 6.63           | 1.3E-02                 | 1.0E-02        | 1.31                        | 0.398882 | 1.31                            | OKAY     |
| PLD1     | E05  | 11.60                                  | 10.67          | 3.2E-04                 | 6.1E-04        | <b>0.52</b>                 | 0.468202 | <b>-1.91</b>                    | A        |
| PRKCA    | E06  | 11.65                                  | 11.30          | 3.1E-04                 | 4.0E-04        | 0.78                        | 0.954325 | -1.28                           | A        |
| PTEN     | E07  | 10.75                                  | 10.27          | 5.8E-04                 | 8.1E-04        | 0.72                        | 0.354003 | -1.39                           | OKAY     |
| PTK2     | E08  | 7.18                                   | 6.89           | 6.9E-03                 | 8.5E-03        | 0.81                        | 0.843182 | -1.23                           | OKAY     |
| PTK2B    | E09  | 9.72                                   | 8.84           | 1.2E-03                 | 2.2E-03        | <b>0.54</b>                 | 0.602656 | <b>-1.84</b>                    | OKAY     |
| PTPN1    | E10  | 10.38                                  | 10.59          | 7.5E-04                 | 6.5E-04        | 1.16                        | 0.245040 | 1.16                            | OKAY     |
| PXN      | E11  | 10.79                                  | 9.76           | 5.6E-04                 | 1.2E-03        | <b>0.49</b>                 | 0.518522 | <b>-2.05</b>                    | OKAY     |
| RAC1     | E12  | 10.59                                  | 9.02           | 6.5E-04                 | 1.9E-03        | <b>0.34</b>                 | 0.375235 | <b>-2.96</b>                    | OKAY     |
| RAC2     | F01  | 5.96                                   | 5.58           | 1.6E-02                 | 2.1E-02        | 0.77                        | 0.304314 | -1.30                           | OKAY     |
| RASA1    | F02  | 12.26                                  | 12.10          | 2.0E-04                 | 2.3E-04        | 0.90                        | 0.900260 | -1.11                           | B        |
| RDX      | F03  | 9.76                                   | 9.19           | 1.2E-03                 | 1.7E-03        | 0.67                        | 0.812743 | -1.48                           | OKAY     |
| RHO      | F04  | 6.97                                   | 6.61           | 8.0E-03                 | 1.0E-02        | 0.78                        | 0.668742 | -1.28                           | OKAY     |
| RHOA     | F05  | 15.44                                  | 15.35          | 2.2E-05                 | 2.4E-05        | 0.94                        | 0.668130 | -1.06                           | B        |
| RHOB     | F06  | 3.88                                   | 3.34           | 6.8E-02                 | 9.9E-02        | 0.69                        | 0.477047 | -1.45                           | OKAY     |
| RHOC     | F07  | 7.20                                   | 6.31           | 6.8E-03                 | 1.3E-02        | <b>0.54</b>                 | 0.355561 | <b>-1.86</b>                    | OKAY     |
| RND3     | F08  | 4.55                                   | 4.15           | 4.3E-02                 | 5.6E-02        | 0.76                        | 0.398585 | -1.32                           | OKAY     |
| ROCK1    | F09  | 6.08                                   | 5.54           | 1.5E-02                 | 2.1E-02        | 0.69                        | 0.800315 | -1.45                           | OKAY     |
| SH3PXD2A | F10  | 8.72                                   | 8.34           | 2.4E-03                 | 3.1E-03        | 0.77                        | 0.851284 | -1.30                           | OKAY     |
| SRC      | F11  | 10.41                                  | 9.38           | 7.3E-04                 | 1.5E-03        | <b>0.49</b>                 | 0.560302 | <b>-2.04</b>                    | OKAY     |

| Symbol | Well | AVG $\Delta C_t$<br>(Ct(GOI) - Ave Ct) |                   | $2^{-\Delta C_t}$ |                   | Fold Change                    | T-TEST   | Fold Up- or Down-<br>Regulation | Comments |
|--------|------|----------------------------------------|-------------------|-------------------|-------------------|--------------------------------|----------|---------------------------------|----------|
|        |      | Test<br>Sample                         | Control<br>Sample | Test Sample       | Control<br>Sample | Test Sample<br>/Control Sample | p value  | Test Sample<br>/Control Sample  |          |
| STAT3  | F12  | 10.67                                  | 10.40             | 6.2E-04           | 7.4E-04           | 0.83                           | 0.497452 | -1.21                           | OKAY     |
| SVIL   | G01  | 6.52                                   | 6.16              | 1.1E-02           | 1.4E-02           | 0.78                           | 0.654091 | -1.29                           | OKAY     |
| TGFB1  | G02  | 6.73                                   | 6.62              | 9.4E-03           | 1.0E-02           | 0.93                           | 0.907802 | -1.08                           | OKAY     |
| TIMP2  | G03  | 7.09                                   | 6.09              | 7.3E-03           | 1.5E-02           | <b>0.50</b>                    | 0.372745 | <b>-2.00</b>                    | OKAY     |
| TLN1   | G04  | 5.95                                   | 5.17              | 1.6E-02           | 2.8E-02           | <b>0.59</b>                    | 0.325961 | <b>-1.71</b>                    | OKAY     |
| VASP   | G05  | 9.19                                   | 7.31              | 1.7E-03           | 6.3E-03           | <b>0.27</b>                    | 0.496028 | <b>-3.68</b>                    | OKAY     |
| VCL    | G06  | 8.46                                   | 8.03              | 2.8E-03           | 3.8E-03           | 0.74                           | 0.430090 | -1.34                           | OKAY     |
| VEGFA  | G07  | 9.51                                   | 8.24              | 1.4E-03           | 3.3E-03           | <b>0.41</b>                    | 0.471758 | <b>-2.42</b>                    | OKAY     |
| VIM    | G08  | 6.21                                   | 5.54              | 1.3E-02           | 2.1E-02           | <b>0.63</b>                    | 0.902025 | <b>-1.59</b>                    | OKAY     |
| WASF1  | G09  | 12.02                                  | 12.08             | 2.4E-04           | 2.3E-04           | 1.04                           | 0.945265 | 1.04                            | B        |
| WASF2  | G10  | 9.38                                   | 9.48              | 1.5E-03           | 1.4E-03           | 1.07                           | 0.894387 | 1.07                            | OKAY     |
| WASL   | G11  | 9.47                                   | 8.53              | 1.4E-03           | 2.7E-03           | <b>0.52</b>                    | 0.521950 | <b>-1.91</b>                    | OKAY     |
| WIPF1  | G12  | 8.11                                   | 7.60              | 3.6E-03           | 5.2E-03           | 0.70                           | 0.824752 | -1.42                           | OKAY     |
| ACTB   | H01  | -0.10                                  | -0.11             | 1.1E+00           | 1.1E+00           | 1.00                           | 0.880204 | -1.00                           | OKAY     |
| B2M    | H02  | 1.97                                   | 1.76              | 2.6E-01           | 3.0E-01           | 0.86                           | 0.499910 | -1.16                           | OKAY     |
| GAPDH  | H03  | 8.44                                   | 8.01              | 2.9E-03           | 3.9E-03           | 0.74                           | 0.373450 | -1.35                           | OKAY     |
| HPRT1  | H04  | 1.44                                   | 0.67              | 3.7E-01           | 6.3E-01           | <b>0.59</b>                    | 0.563287 | <b>-1.70</b>                    | OKAY     |
| RPLP0  | H05  | 0.10                                   | 0.11              | 9.3E-01           | 9.3E-01           | 1.00                           | 0.896841 | 1.00                            | OKAY     |

**Legend:**

**Fold-Change** ( $2^{\Delta(-\Delta\Delta Ct)}$ ) is the normalized gene expression ( $2^{\Delta(-\Delta Ct)}$ ) in the Test Sample divided the normalized gene expression ( $2^{\Delta(-\Delta Ct)}$ ) in the Control Sample.

**Fold-Regulation** represents fold-change results in a biologically meaningful way. Fold-change values greater than one indicate a positive- or an up-regulation, and the fold-regulation is equal to the fold-change

Fold-change values less than one indicate a negative or down-regulation, and the fold-regulation is the negative inverse of the fold-change.

Fold-change and fold-regulation values greater than 2 are indicated in red; fold-change values less than 0.5 and fold-regulation values less than -2 are indicated in blue.

**p-values:** The p values are calculated based on a Student's t-test of the replicate  $2^{\Delta(-\Delta Ct)}$  values for each gene in the control group and treatment groups, and p values less than 0.05 are indicated in red.

**Comments:**

A: This gene's average threshold cycle is relatively high (> 30) in either the control or the test sample, and is reasonably low in the other sample (< 30).

These data mean that the gene's expression is relatively low in one sample and reasonably detected in the other sample suggesting that the actual fold-change value is at least as large as the calculated and reported fold-change result.

This fold-change result may also have greater variations if p value > 0.05; therefore, it is important to have a sufficient number of biological replicates to validate the result for this gene.

B: This gene's average threshold cycle is relatively high (> 30), meaning that its relative expression level is low, in both control and test samples, and the p-value for the fold-change is either unavailable or relatively high ( $p > 0.05$ ).

This fold-change result may also have greater variations; therefore, it is important to have a sufficient number of biological replicates to validate the result for this gene.

C: This gene's average threshold cycle is either not determined or greater than the defined cut-off (default 35), in both samples meaning that its expression was undetected, making this fold-change result erroneous and un-interpretable.

|                                      |          |                                        |             |
|--------------------------------------|----------|----------------------------------------|-------------|
| <b>Threshold for Fold Difference</b> | <b>2</b> | <b>Threshold for p Value of t-test</b> | <b>0.05</b> |
|--------------------------------------|----------|----------------------------------------|-------------|

The black line indicates a fold-change in gene expression of 1. The pink lines indicate the desired fold-change in gene expression threshold, as defined by the user in the yellow D1 cell.

The blue line indicates the desired threshold for the p value of the t-test, as defined by user in the yellow I1 cell.

The scale of the X and Y axes can be adjusted by double clicking on them and then re-formatting using the standard functions of Microsoft Excel.

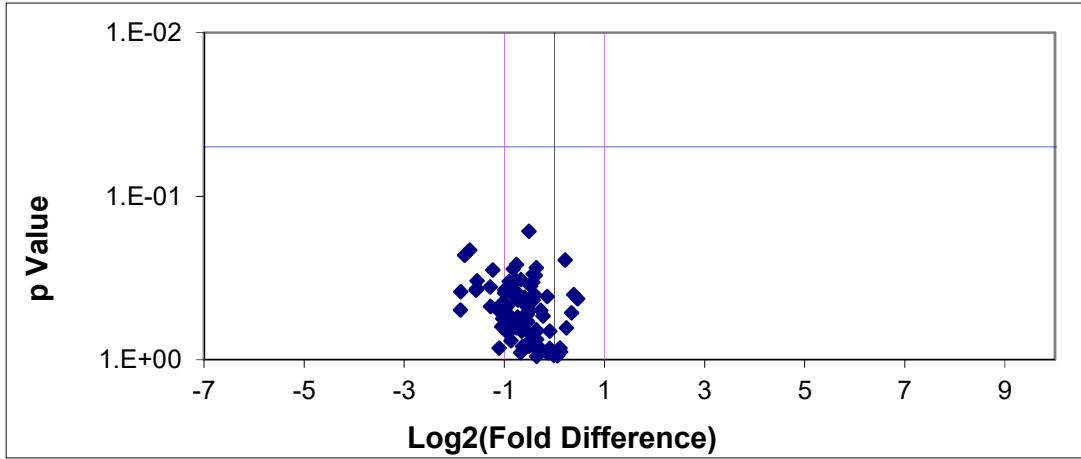

**Volcano Plot**

| Well | Symbol   | Log2(FC) | p Value | Comments | Well | Symbol   | Log2(FC) | p Value | Comments |
|------|----------|----------|---------|----------|------|----------|----------|---------|----------|
| A01  | ACTN1    | 0.11     | 8.5E-01 | OKAY     | D07  | MYH10    | -1.87    | 3.8E-01 | OKAY     |
| A02  | ACTN3    | -0.76    | 2.6E-01 | B        | D08  | MYH9     | -0.86    | 7.6E-01 | OKAY     |
| A03  | ACTN4    | -0.09    | 8.5E-01 | OKAY     | D09  | MYL9     | -0.43    | 3.4E-01 | OKAY     |
| A04  | ACTR2    | -0.36    | 7.5E-01 | OKAY     | D10  | MYLK     | -0.42    | 3.0E-01 | OKAY     |
| A05  | ACTR3    | -0.52    | 5.1E-01 | OKAY     | D11  | PAK1     | -1.80    | 2.3E-01 | B        |
| A06  | AKT1     | -1.23    | 2.8E-01 | OKAY     | D12  | PAK4     | -0.73    | 4.3E-01 | OKAY     |
| A07  | ARF6     | -0.66    | 6.2E-01 | OKAY     | E01  | PFN1     | -0.54    | 5.3E-01 | OKAY     |
| A08  | ARHGDI3  | -0.73    | 3.9E-01 | OKAY     | E02  | PIK3CA   | -0.15    | 4.1E-01 | OKAY     |
| A09  | ARHGGEF7 | -0.66    | 6.7E-01 | OKAY     | E03  | PLAUR    | -0.86    | 5.9E-01 | OKAY     |
| A10  | BAIAP2   | -1.69    | 2.1E-01 | B        | E04  | PLCG1    | 0.39     | 4.0E-01 | OKAY     |
| A11  | BCAR1    | -0.88    | 3.9E-01 | OKAY     | E05  | PLD1     | -0.93    | 4.7E-01 | A        |
| A12  | CAPN1    | -0.01    | 9.4E-01 | OKAY     | E06  | PRKCA    | -0.35    | 9.5E-01 | A        |
| B01  | CAPN2    | -0.99    | 3.9E-01 | OKAY     | E07  | PTEN     | -0.47    | 3.5E-01 | OKAY     |
| B02  | CAV1     | -0.45    | 4.4E-01 | OKAY     | E08  | PTK2     | -0.30    | 8.4E-01 | OKAY     |
| B03  | CDC42    | -0.60    | 4.1E-01 | OKAY     | E09  | PTK2B    | -0.88    | 6.0E-01 | OKAY     |
| B04  | CFL1     | -0.51    | 1.6E-01 | OKAY     | E10  | PTPN1    | 0.22     | 2.5E-01 | OKAY     |
| B05  | CRK      | -0.47    | 7.0E-01 | OKAY     | E11  | PXN      | -1.04    | 5.2E-01 | OKAY     |
| B06  | CSF1     | -1.10    | 8.5E-01 | OKAY     | E12  | RAC1     | -1.57    | 3.8E-01 | OKAY     |
| B07  | CTTN     | -0.82    | 2.8E-01 | OKAY     | F01  | RAC2     | -0.38    | 3.0E-01 | OKAY     |
| B08  | DIAPH1   | -0.55    | 5.3E-01 | OKAY     | F02  | RASA1    | -0.16    | 9.0E-01 | B        |
| B09  | DPP4     | -1.28    | 3.6E-01 | B        | F03  | RDX      | -0.57    | 8.1E-01 | OKAY     |
| B10  | EGF      | -0.23    | 5.4E-01 | OKAY     | F04  | RHO      | -0.35    | 6.7E-01 | OKAY     |
| B11  | EGFR     | -1.13    | 4.9E-01 | B        | F05  | RHOA     | -0.09    | 6.7E-01 | B        |
| B12  | ENAH     | -1.07    | 4.6E-01 | OKAY     | F06  | RHOB     | -0.54    | 4.8E-01 | OKAY     |
| C01  | EZR      | -0.54    | 5.8E-01 | OKAY     | F07  | RHOC     | -0.90    | 3.6E-01 | OKAY     |
| C02  | FAP      | -0.55    | 5.2E-01 | OKAY     | F08  | RND3     | -0.40    | 4.0E-01 | OKAY     |
| C03  | FGF2     | -0.64    | 8.3E-01 | OKAY     | F09  | ROCK1    | -0.54    | 8.0E-01 | OKAY     |
| C04  | HGF      | -0.61    | 6.2E-01 | B        | F10  | SH3PXD2A | -0.38    | 8.5E-01 | OKAY     |
| C05  | IGF1     | 0.24     | 6.4E-01 | B        | F11  | SRC      | -1.03    | 5.6E-01 | OKAY     |
| C06  | IGF1R    | -1.54    | 3.3E-01 | OKAY     | F12  | STAT3    | -0.27    | 5.0E-01 | OKAY     |
| C07  | ILK      | -0.36    | 2.7E-01 | OKAY     | G01  | SVIL     | -0.36    | 6.5E-01 | OKAY     |
| C08  | ITGA4    | 0.13     | 8.9E-01 | B        | G02  | TGFB1    | -0.11    | 9.1E-01 | OKAY     |
| C09  | ITGB1    | -0.90    | 3.3E-01 | B        | G03  | TIMP2    | -1.00    | 3.7E-01 | OKAY     |
| C10  | ITGB2    | -1.05    | 6.3E-01 | OKAY     | G04  | TLN1     | -0.77    | 3.3E-01 | OKAY     |
| C11  | ITGB3    | 0.46     | 4.2E-01 | OKAY     | G05  | VASP     | -1.88    | 5.0E-01 | OKAY     |
| C12  | LIMK1    | 0.34     | 5.2E-01 | OKAY     | G06  | VCL      | -0.43    | 4.3E-01 | OKAY     |
| D01  | MAPK1    | -0.67    | 3.2E-01 | B        | G07  | VEGFA    | -1.27    | 4.7E-01 | OKAY     |
| D02  | MET      | -0.74    | 5.5E-01 | OKAY     | G08  | VIM      | -0.67    | 9.0E-01 | OKAY     |
| D03  | MMP14    | -1.55    | 3.7E-01 | OKAY     | G09  | WASF1    | 0.06     | 9.5E-01 | B        |
| D04  | MMP2     | -0.75    | 6.4E-01 | OKAY     | G10  | WASF2    | 0.10     | 8.9E-01 | OKAY     |
| D05  | MMP9     | -0.76    | 5.8E-01 | OKAY     | G11  | WASL     | -0.94    | 5.2E-01 | OKAY     |
| D06  | MSN      | -0.93    | 6.9E-01 | B        | G12  | WIPF1    | -0.51    | 8.2E-01 | OKAY     |
