# Supplementary material for: Decreased Tiam1‐mediated Rac1 activation is responsible for impaired directional persistence of chondrocyte migration in microtia
Source: PubMed Central journal article supplement (PMC11149491; doi:10.1111/jcmm.18443), 2024-06-04
Supplement: JCMM-28-e18443-s007.pdf [file JCMM-28-e18443-s007.pdf]

**Supplementary Table 1. Primers Sequences**

| Gene                    | Primer 5'-3'                                          |
|-------------------------|-------------------------------------------------------|
| <i>ABR</i>              | F: GTCCTGGATCGACACCCTCT<br>R: TCAGCTTGGCACACAGTAGG    |
| <i>ARHGAP19</i>         | F: AGGCACAGAGTGAAGGGGAG<br>R: CAATCTCGCACACTCCCGAA    |
| <i>ARHGEF12</i>         | F: GACCCACAGATAGCTCCTC<br>R: TGTCCAATGACTGACGGCTC     |
| <i>ENAH</i>             | F: GACTTGTCTCCCGTCTCC<br>R: GCAGCTCTTGCTGACAGAT       |
| <i>GAPDH</i>            | F: CTCTGCTCCTCCTGTTCGAC<br>R: TTAAAAGCAGCCCTGGTGAC    |
| <i>ARHGEF14 / MCF2L</i> | F: GAGGTTTTGGCTGAGGACTGA<br>R: GTGTGCTTGGAACCGCATT    |
| <i>MMP14</i>            | F: GTGGTCTCGGACCATGTCTC<br>R: GGTAGCCATATTGCTGTAGCC   |
| <i>PXN</i>              | F: AAAGTTGCGGGGCATAGAC<br>R: GTAGACTCCAAGTCCGCCAG     |
| <i>RAC1</i>             | F: CTGATGCAGGCCATCAAGT<br>R: TCTCCAGGAAATGCATTGGT     |
| <i>TIAM1</i>            | F: GCTGGGCAAGTGGAAAAAGG<br>R: GGGAAGGCTCTCGGTTTTGA    |
| <i>ARHGEF23 / TRIO</i>  | F: GGAAGTCACGGGAAGGACTC<br>R: GCACTCCAACACTCCACGTA    |
| <i>VASP</i>             | F: GAACCCCTGAACCTCCAGC<br>R: ATAAAGCATCACAGTGGCCC     |
| <i>rac1 (Mus)</i>       | F: CGCAGACAGTTGGAGACACAT<br>R: GTGGTGTCGCACTTCAGGAT   |
| <i>tiam1 (Mus)</i>      | F: GAGCTGCCAAACCCCAAAG<br>R: CGCCTTCTCACTCCGATCTC     |
| <i>β-actin (Mus)</i>    | F: GATCAAGATCATTGCTCCTCCTG<br>R: AGGGTGTA AACGCAGCTCA |
